# Supplementary material for: Thermoelectric (Bi,Sb)2Te3–Ge0.5Mn0.5Te composites with excellent mechanical properties
Source: Royal Society of Chemistry journal article supplement (doi:10.1039/c9ta01962f), 2019-01-01
Supplement: c9ta01962f1.pdf [file c9ta01962f1.pdf]

Supporting information

## Thermoelectric $(\text{Bi,Sb})_2\text{Te}_3$ - $\text{Ge}_{0.5}\text{Mn}_{0.5}\text{Te}$ composites with excellent mechanical properties

Sichen Duan<sup>a,b</sup>, Na Man<sup>b,c</sup>, Jingtao Xu<sup>\*,b,c</sup>, Qingsong Wu<sup>d</sup>, Guo-qiang Liu<sup>b,c</sup>, Xiaojian Tan<sup>b,c</sup>,

Hezhu Shao<sup>b,c</sup>, Kai Guo<sup>a</sup>, Xinxin Yang<sup>\*,a</sup>, and Jun Jiang<sup>\*,b,c</sup>

<sup>a</sup> School of Materials Science and Engineering, Shanghai University, Shanghai 200444, China

<sup>b</sup> Ningbo Institute of Materials Technology and Engineering, Chinese Academy of Sciences, Ningbo 315201, China

<sup>c</sup> Center of Materials Science and Optoelectronics Engineering, University of the Chinese Academy of Sciences, Beijing 100039, China

<sup>d</sup> Laboratory of advanced materials, Fudan University, Shanghai 200438, China

\*Corresponding author E-mail address: xujingtao@nimte.ac.cn (Jingtao Xu), yangxinxin@shu.edu.cn (Xinxin Yang), jjun@nimte.ac.cn (Jun Jiang).

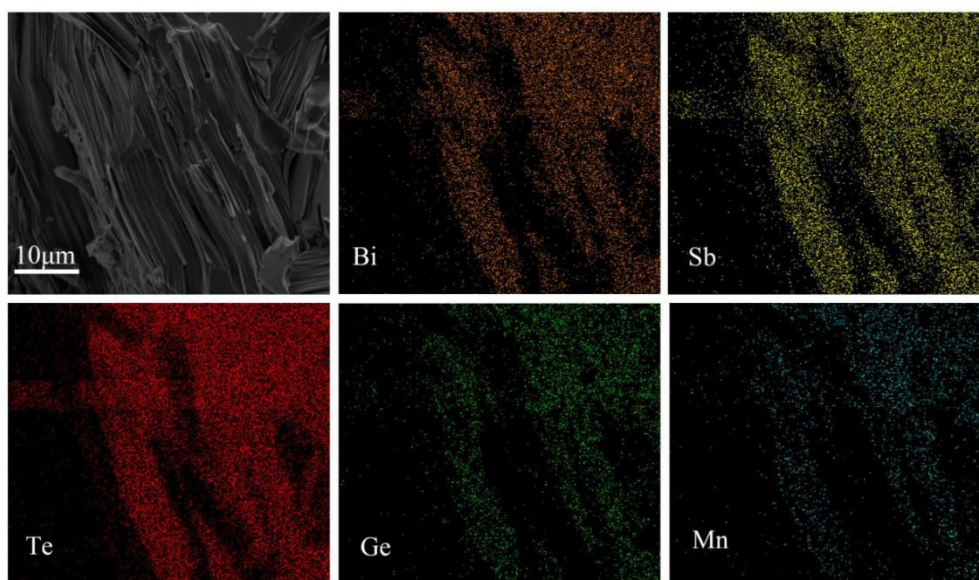

Fig. S1 SEM image and corresponding EDS mappings for  $(\text{Bi,Sb})_2\text{Te}_3$  -  $\text{Ge}_{0.5}\text{Mn}_{0.5}\text{Te}$
